## Efficacy of the PCSK9 inhibitor for lipid-rich coronary plaque reduction: a near-infrared spectroscopy analysis

H. Ota, H. Omori, T. Tanigaki, S. Okamoto, T. Hirata, J. Kikuchi, Y. Sobue, T. Miyake, I. Kawamura, Y. Kawase, M. Okubo, H. Kamiya, K. Tsuchiya, H. Matsuo

*Gifu Heart Center, Department of Cardiology, Gifu, Japan*

**Background:** Recently, some studies have highlighted proprotein convertase subtilisin-kexin type 9 (PCSK9) inhibitors produce incremental low-density lipoprotein cholesterol (LDL-C) lowering effect. However, it is unknown whether the lipid composition of plaque changes is associated with serum LDL-C reduction due to PCSK9 inhibitors administration.

**Purpose:** The purpose of this study was to determine the effects of PCSK9 inhibitor (PCSK9i) on coronary plaque component in patients with a history of coronary artery disease (CAD) assessed by near-infrared spectroscopy intravascular ultrasound (NIRS-IVUS).

**Methods:** A total of 67 non-culprit coronary segments were identified in 34 patients. These lesions were analyzed utilizing NIRS-IVUS at baseline and follow-up coronary angiography (CAG). The subjects were divided into two groups according to lipid-lowering treatment; administration of PCSK9i group (PCSK9i: 19 segments, 9 patients) and traditional statin treatment group (Control: 48 segments, 25 patients). The change of lipid-rich plaque distribution between baseline and follow-up NIRS-IVUS was defined as the change of maximal lipid core burden index (LCBI) score for each of the 4-mm longitudinal segments (maxLCBI4mm).

**Results:** Mean duration from baseline to follow-up CAG was  $239.4 \pm 52.4$  days in the PCSK9i group and  $341.0 \pm 84.1$  days in the Control group ( $p < 0.001$ ). Despite the higher total cholesterol (TC) and low-density lipoprotein cholesterol (LDL-C) in the PCSK9i group at baseline ( $206.6 \pm 40.9$  mg/dl vs.  $168.5 \pm 37.1$  mg/dl,  $131.5 \pm 35.4$  mg/dl vs.  $100.0 \pm 29.5$  mg/dl; respectively,  $p < 0.001$  for both), the PCSK9i group was significantly lower TC and LDL-C at the follow-up ( $111.5 \pm 23.5$  mg/dl vs.  $157.4 \pm 27.8$  mg/dl,  $40.8 \pm 15.7$  mg/dl vs.  $86.2 \pm 19.6$  mg/dl; respectively,  $p < 0.001$  for both). Furthermore, the PCSK9i group induced greater regression of maxLCBI4mm than that of Control group ( $99.6 \pm 156.6$  vs.  $27.9 \pm 118.0$ ,  $p = 0.046$ ) (Figure).

**Conclusion:** Compared with traditional statin therapy, PCSK9i treatment resulted in a greater decrease in lipid component in non-culprit coronary plaques. Therefore, PCSK9i may be useful option in preventing from adverse coronary events for the patients with CAD.

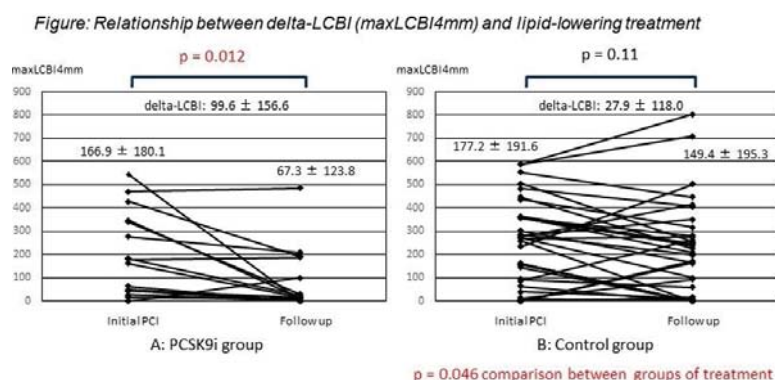

Figure 1
